# Supplementary material for: Stratified Care vs Stepped Care for Depression: A Cluster Randomized Clinical Trial
Source: PubMed Central journal article supplement (PMC8655665; doi:10.1001/jamapsychiatry.2021.3539), 2021-12-08
Supplement: jamapsychiatry-e213539-s003.pdf [file jamapsychiatry-e213539-s003.pdf]

## Data Sharing Statement

Delgadillo. Stratified Care vs Stepped Care for Depression. *JAMA Psychiatry*. Published December 08, 2021. doi:10.1001/jamapsychiatry.2021.3539

### Data

**Data available:** Yes

**Data types:** Deidentified participant data

**How to access data:** In line with the requirements of the research ethics committee that approved this research, requests for access to data are to be made in writing to the corresponding author. Only de-identified participant data in an encrypted file can be made available, along with a data dictionary, to suitably qualified researchers who (a) obtain ethical approval for their proposed analysis; (b) pre-register their statistical analysis plan; (c) provide a signed data-sharing contract which enables data storage and analysis for a time-limited period.

**When available:** With publication

### Supporting Documents

**Document types:** None

### Additional Information

**Who can access the data:** Suitably qualified academic researchers.

**Types of analyses:** Pre-registered statistical analyses.

**Mechanisms of data availability:** Suitably qualified academic researchers who (a) obtain ethical approval for their proposed analysis; (b) pre-register their statistical analysis plan; (c) provide a signed data-sharing contract which enables data storage and analysis for a time-limited period.
